# Supplementary material for: Diversity and Zonation of Benthic Amphipod Crustaceans Affected by the Mississippi Submarine Canyon in the Northern Gulf of Mexico
Source: Frontiers journal article supplement (doi:10.3389/fmars.2022.822924), 2022-03-10
Supplement: Data_Sheet_1.docx [file Data_Sheet_1.docx]

Supplemental materials:

Fig. 1S Olmstead-Tukey test for association of abundance of amphipod families and frequency of appearance (%) for Canyon (●) and non-canyon (●) transects in the NGoM.

The lines dividing the quadrants correspond to the median values of the axes.


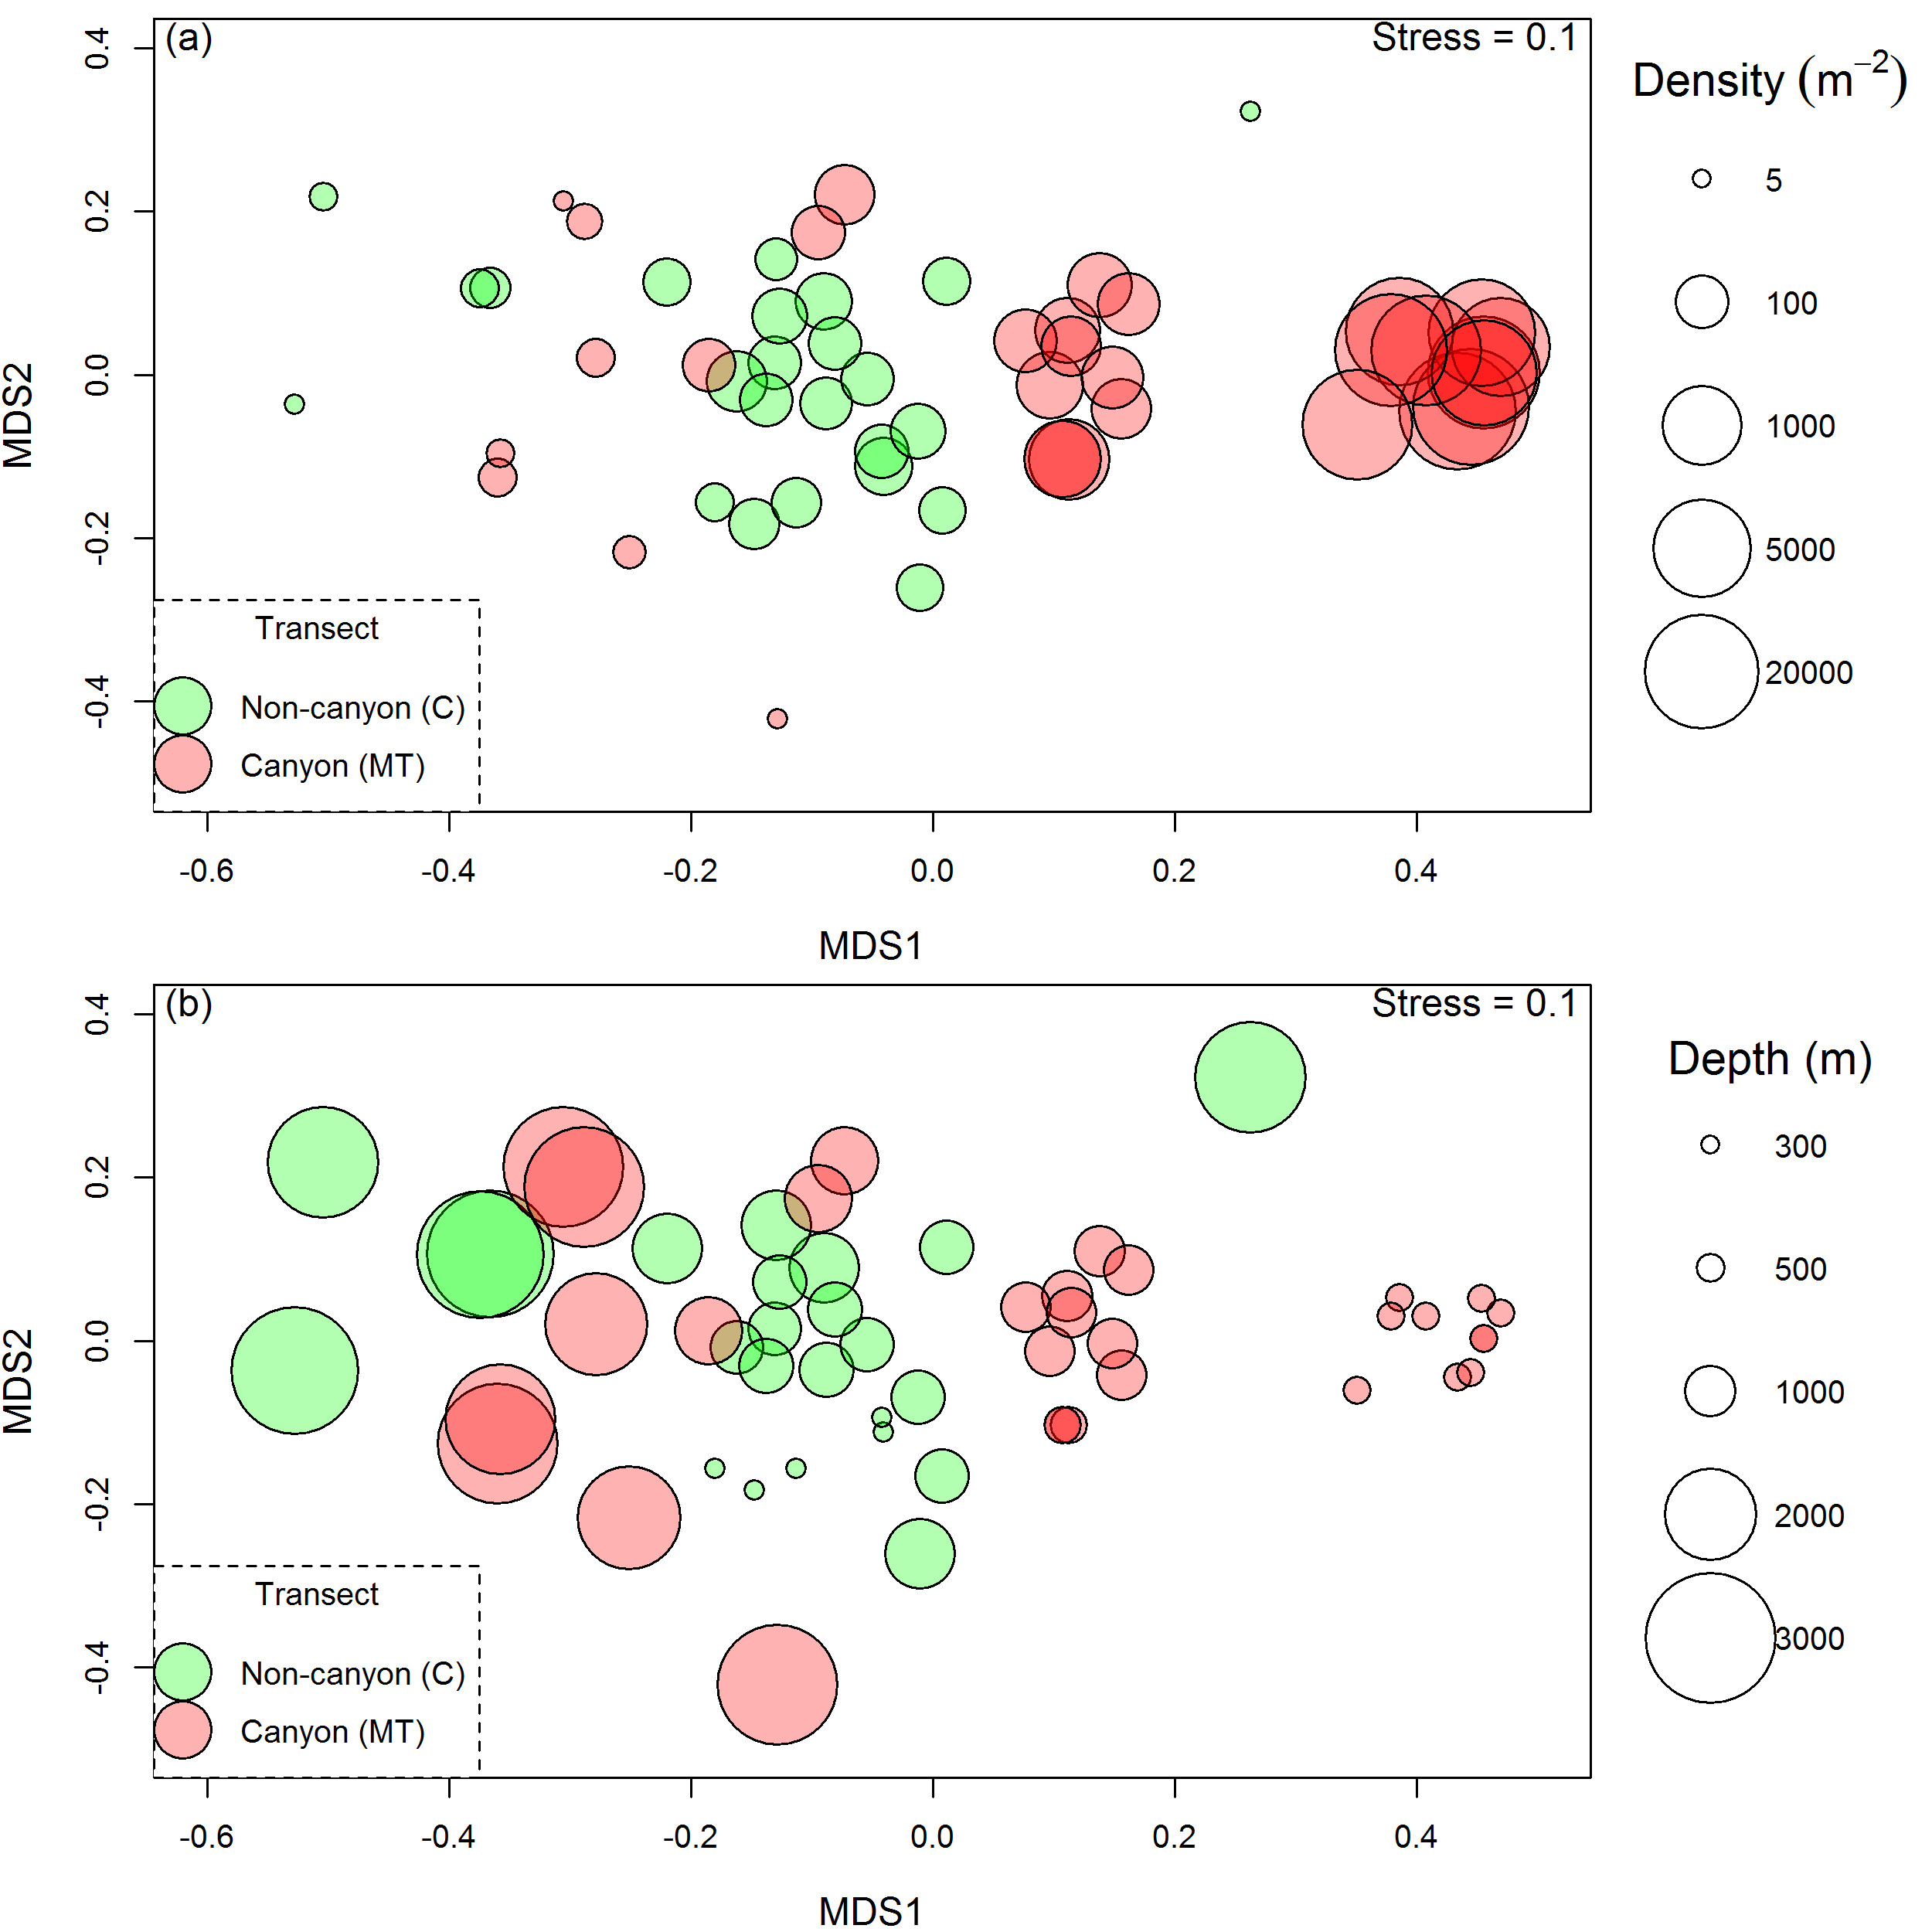


Fig. 2S. MDS ordination of DGOMB stations, based on Bray–Curtis similarity (4th root transformation) of amphipod species abundance data. Bubble size equals relative amphipod (a) density per square meter and (b) water depth (m).

Table 1S. Sampling stations and their geographical locations in the Mississippi Canyon (MT) and central transect (C), Northern Gulf of Mexico.

| **Cruise** | **STATION** | **Replicate** | **Depth** | **Date** | **Latitude** | **Longitude** |
| --- | --- | --- | --- | --- | --- | --- |
| 1 | C1 | 1 | 336 | 5/30/2000 | 28.05964 | -90.2491 |
| 1 | C1 | 2 | 336 | 5/30/2000 | 28.05938 | -90.2492 |
| 1 | C1 | 3 | 336 | 5/30/2000 | 28.05979 | -90.2494 |
| 1 | C1 | 4 | 336 | 5/30/2000 | 28.05984 | -90.2499 |
| 1 | C1 | 5 | 334 | 5/30/2000 | 28.06008 | -90.2489 |
| 1 | C12 | 1 | 2922 | 6/2/2000 | 26.37942 | -89.2414 |
| 1 | C12 | 2 | 2920 | 6/2/2000 | 26.38292 | -89.2414 |
| 1 | C12 | 3 | 2918 | 6/2/2000 | 26.37336 | -89.2376 |
| 1 | C12 | 4 | 2920 | 6/3/2000 | 26.37973 | -89.2403 |
| 1 | C12 | 5 | 2924 | 6/2/2000 | 26.37496 | -89.2431 |
| 1 | C14 | 1 | 2487 | 6/1/2000 | 26.92995 | -89.5704 |
| 1 | C14 | 2 | 2495 | 6/1/2000 | 26.92983 | -89.5645 |
| 1 | C14 | 3 | 2487 | 6/1/2000 | 26.92989 | -89.5709 |
| 1 | C14 | 4 | 2478 | 6/1/2000 | 26.93824 | -89.5725 |
| 1 | C14 | 5 | 2487 | 6/1/2000 | 26.92956 | -89.5714 |
| 1 | C4 | 1 | 1472 | 5/31/2000 | 27.45315 | -89.7631 |
| 1 | C4 | 2 | 1455 | 5/31/2000 | 27.4594 | -89.7857 |
| 1 | C4 | 3 | 1452 | 5/31/2000 | 27.46017 | -89.7795 |
| 1 | C4 | 4 | 1463 | 5/31/2000 | 27.45242 | -89.776 |
| 1 | C4 | 5 | 1476 | 5/31/2000 | 27.45054 | -89.7619 |
| 1 | C7 | 1 | 1080 | 5/30/2000 | 27.72828 | -89.9796 |
| 1 | C7 | 2 | 1070 | 5/30/2000 | 27.73286 | -89.9772 |
| 1 | C7 | 3 | 1066 | 5/30/2000 | 27.73152 | -89.9835 |
| 1 | C7 | 4 | 1070 | 5/30/2000 | 27.73015 | -89.9854 |
| 1 | C7 | 5 | 1072 | 5/30/2000 | 27.73044 | -89.982 |
| 1 | MT1 | 1 | 480 | 6/17/2000 | 28.54188 | -89.8289 |
| 1 | MT1 | 2 | 482 | 6/17/2000 | 28.53951 | -89.8289 |
| 1 | MT1 | 3 | 482 | 6/17/2000 | 28.54114 | -89.8271 |
| 1 | MT1 | 4 | 481 | 6/17/2000 | 28.54059 | -89.8288 |
| 1 | MT1 | 5 | 481 | 6/17/2000 | 28.54111 | -89.825 |
| 1 | MT2 | 1 | 676 | 6/17/2000 | 28.45108 | -89.6726 |
| 1 | MT2 | 2 | 677 | 6/17/2000 | 28.45121 | -89.6703 |
| 1 | MT2 | 3 | 676 | 6/17/2000 | 28.45055 | -89.6727 |
| 1 | MT2 | 4 | 677 | 6/17/2000 | 28.45028 | -89.6733 |
| 1 | MT2 | 5 | 680 | 6/17/2000 | 28.44793 | -89.6719 |
| 1 | MT3 | 1 | 983 | 6/16/2000 | 28.22041 | -89.4961 |
| 1 | MT3 | 2 | 987 | 6/16/2000 | 28.21922 | -89.4964 |
| 1 | MT3 | 3 | 990 | 6/16/2000 | 28.21904 | -89.4918 |
| 1 | MT3 | 4 | 988 | 6/16/2000 | 28.2176 | -89.4938 |
| 1 | MT3 | 5 | 985 | 6/16/2000 | 28.22151 | -89.494 |
| 1 | MT4 | 1 | 1401 | 6/15/2000 | 27.827 | -89.1659 |
| 1 | MT4 | 2 | 1401 | 6/15/2000 | 27.82836 | -89.1647 |
| 1 | MT4 | 3 | 1402 | 6/16/2000 | 27.83348 | -89.1658 |
| 1 | MT4 | 4 | 1402 | 6/16/2000 | 27.82761 | -89.1661 |
| 1 | MT4 | 5 | 1401 | 6/16/2000 | 27.82802 | -89.1679 |
| 1 | MT5 | 1 | 2290 | 6/3/2000 | 27.32635 | -88.6696 |
| Table 1, continued. | | | | | | |
| **Cruise** | **STATION** | **Replicate** | **Depth** | **Date** | **Latitude** | **Longitude** |
| 1 | MT5 | 3 | 2267 | 6/4/2000 | 27.3346 | -88.6622 |
| 1 | MT5 | 4 | 2263 | 6/4/2000 | 27.33652 | -88.6595 |
| 1 | MT5 | 5 | 2280 | 6/4/2000 | 27.33284 | -88.6561 |
| 1 | MT6 | 1 | 2745 | 6/4/2000 | 27.00011 | -87.9978 |
| 1 | MT6 | 2 | 2750 | 6/5/2000 | 27.00149 | -87.9882 |
| 1 | MT6 | 3 | 2745 | 6/5/2000 | 26.99651 | -87.9987 |
| 1 | MT6 | 4 | 2745 | 6/5/2000 | 26.99948 | -87.9962 |
| 1 | MT6 | 5 | 2743 | 6/5/2000 | 27.00165 | -87.9991 |
| 2 | MT1 | 1 | 487 | 6/2/2001 | 28.53808 | -89.8277 |
| 2 | MT1 | 2 | 490 | 6/2/2001 | 28.53517 | -89.8256 |
| 2 | MT1 | 3 | 485 | 6/3/2001 | 28.53883 | -89.8303 |
| 2 | MT1 | 4 | 480 | 6/3/2001 | 28.54105 | -89.8308 |
| 2 | MT1 | 5 | 478 | 6/3/2001 | 28.54185 | -89.8294 |
| 2 | MT3 | 1 | 980 | 6/4/2001 | 28.22455 | -89.5126 |
| 2 | MT3 | 2 | 982 | 6/4/2001 | 28.22443 | -89.5066 |
| 2 | MT3 | 3 | 984 | 6/4/2001 | 28.22263 | -89.5058 |
| 2 | MT3 | 4 | 984 | 6/4/2001 | 28.22083 | -89.5054 |
| 2 | MT3 | 5 | 985 | 6/4/2001 | 28.22104 | -89.5092 |
| 2 | MT6 | 1 | 2740 | 6/13/2001 | 26.99068 | -88.014 |
| 2 | MT6 | 2 | 2733 | 6/13/2001 | 27.0034 | -88.0145 |
| 2 | MT6 | 3 | 2741 | 6/13/2001 | 26.98583 | -88.0113 |
| 2 | MT6 | 4 | 2737 | 6/13/2001 | 26.99441 | -88.0115 |
| 2 | MT6 | 5 | 2740 | 6/14/2001 | 26.98816 | -88.0142 |
| 3b | MT1 | 1 | 470 | 8/13/2002 | 28.55335 | -89.8218 |
| 3b | MT1 | 2 | 460 | 8/13/2002 | 28.56121 | -89.8286 |
| 3b | MT1 | 3 | 465 | 8/13/2002 | 28.55418 | -89.823 |
| 3b | MT1 | 4 | 465 | 8/13/2002 | 28.56112 | -89.8209 |
| 4 | MT1 | 1 | 485 | 08/04/2004 | 27.6291 | -89.4273 |

Table 2S. The average measurements for 20 environmental factors measured in the sediment and near bottom water in the 11 locations of the study area during the period 2000-2004.

| **Station** | **MT1** | **MT2** | **MT3** | **MT4** | **MT5** | **MT6** | **C1** | **C2** | **C3** | **C4** | **C5** |  |
| --- | --- | --- | --- | --- | --- | --- | --- | --- | --- | --- | --- | --- |
| Depth | 481 | 677 | 983 | 1401 | 2277 | 2746 | 335 | 1072 | 1457 | 2922 | 2489 |  |
| Longitude | -89.83 | -89.67 | -89.51 | -89.19 | -88.67 | -88 | -90.25 | -89.98 | -89.78 | -89.24 | -89.58 |  |
| Latitude | 28.54 | 28.45 | 28.22 | 27.83 | 27.33 | 27 | 28.06 | 27.73 | 27.45 | 26.38 | 26.93 |  |
| Temperature | 9.24 | 6.27 | 5.05 | 4.25 | 4.25 | 4.3 | 11.67 | 4.95 | 4.33 | 4.32 | 4.27 |  |
| CHL | 2.47 | 2.13 | 0.75 | 0.41 | 0.24 | 0.19 | 0.5 | 0.28 | 0.22 | 0.2 | 0.19 |  |
| POC | 18.4 | 28.5 | 19.3 | 8.2 | 5.4 | 23.9 | 48.9 | 19.1 | 18.6 | 8.8 | 25.7 |  |
| PON | 5.7 | 4.4 | 3.4 | 2 | 2.3 | 4.5 | 5.5 | 2.9 | 3 | 1.8 | 4 |  |
| C/N | 3.6 | 7.7 | 7.4 | 7.2 | 5.4 | 6.7 | 9.9 | 8.6 | 8 | 8.1 | 7.9 |  |
| DO (mg/L) | 2.46 | 3.05 | 4.13 | 4.31 | 5.54 | 4.39 | 2.53 | 3.71 | 4.21 | 4.45 | 4.39 |  |
| % Sand | 2 | 2.7 | 4.1 | 9 | 64.3 | 29.7 | 4.3 | 8 | 10.8 | 24.6 | 4.8 |  |
| % Silt | 33 | 40.1 | 40.7 | 45.5 | 15.3 | 26.9 | 35 | 40.5 | 36.3 | 40.7 | 22.8 |  |
| %/Clay | 65 | 57.1 | 55.2 | 45.5 | 20.4 | 43.4 | 60.7 | 51.5 | 52.9 | 34.7 | 72.4 |  |
| NO3 (µM) | 20.4 | 17.4 | 23.8 | 19.1 | 14.5 | 10.9 |  | 18.9 | 19.8 | 21.75 | 12.4 |  |
| NH4 (µM) | 27.5 | 26.8 | 10.3 | 24.5 | 33.1 | 10.2 | 15 | 20.4 | 21.5 | 18.3 | 8.9 |  |
| UREA (µM) | 4.4 | 2.7 | 3.8 | 2.6 | 3.3 | 3.5 | 3.2 | 3.3 | 3.6 | 3.8 | 3.5 |  |
| Be | 2.1 | 2 | 2 | 1.7 | 0.9 | 1.1 | 1.8 | 1.6 | 1.8 | 1.1 | 1.6 |  |
| Sn (µg/L) | 2.5 | 2.5 | 2.5 | 1.7 | 0.6 | 0.7 | 2.2 | 1.4 | 1.9 | 0.9 | 1.5 |  |
| Fe (µg/L) | 37650 | 35400 | 37200 | 29900 | 15800 | 25950 | 32700 | 26900 | 32250 | 20700 | 29900 |  |
| Cr (µg/L) | 70.5 | 68.2 | 67.4 | 57.3 | 30.4 | 49.6 | 63.5 | 54.2 | 59.6 | 44.2 | 61.2 |  |
| DOC (mM) | 0.953 | 1.803 | 2.234 | 2.718 | 2.374 | 3.063 | 2.178 | 1.919 | 1.34 | 1.923 | 3.188 |  |
| POC_µg/L | 38.3 | 28.5 | 43.8 | 8.2 | 5.4 | 12.9 | 48.9 | 18.6 | 22.5 | 8.8 | 25.7 |  |
| PON_µg/L | 2.55 | 4.43 | 5.105 | 1.99 | 2.29 | 3.45 | 5.48 |  | 3.93 | 1.79 | 3.99 |  |
|  |  |  |  |  |  |  |  |  |  |  |  |  |

Table 3S. Variable loads for the rotated (varimax ) factor for the metals PCA.

| Metals | PC1 | PC2 | PC3 | PC4 |
| --- | --- | --- | --- | --- |
| Ag | .029 | .661 | .713 | -.025 |
| Al | .967 | .201 | .001 | -.104 |
| As | .800 | -.452 | -.084 | .042 |
| Ba | .560 | -.442 | .093 | .512 |
| Be | .992 | .021 | .022 | -.054 |
| Ca | -.973 | .220 | -.019 | .056 |
| Cd | .496 | .248 | .476 | -.359 |
| Co | .800 | .240 | -.522 | .031 |
| Cr | .976 | .034 | -.154 | -.030 |
| Cu | -.102 | .814 | -.544 | .053 |
| Fe | .991 | -.001 | -.072 | -.038 |
| K | .971 | .126 | -.001 | -.136 |
| Mg | .833 | .368 | -.296 | .161 |
| Mn | .847 | -.473 | -.145 | .081 |
| Na | .895 | .104 | .217 | .327 |
| Ni | .740 | .575 | -.286 | .037 |
| P | .763 | .283 | .159 | -.116 |
| Pb | .936 | -.129 | .230 | .119 |
| S | .855 | -.017 | .234 | .439 |
| Sb | .831 | -.312 | .080 | .102 |
| Si | .485 | -.222 | .002 | -.739 |
| Sn | .980 | -.131 | .063 | -.035 |
| Sr | -.903 | .371 | -.106 | .167 |
| Ti | .946 | -.046 | -.215 | -.120 |
| Tl | .545 | .667 | .367 | .178 |
| V | .973 | .173 | -.136 | -.042 |
| Zn | .925 | .044 | .069 | -.175 |
| % of variance | | 67.5% | 12.2% | 7,2% | 5.4% |

Table 4S. Principal Component Analysis matrix containing variable loads for the component of the environmental parameters for the canyon transect.

|  | PC1  53.56% | PC2  25.28% | PC3  14.16% | PC4  6.98% |
| --- | --- | --- | --- | --- |
| TEMP | .725 | .670 | -.071 | -.146 |
| DO (mg/L) | -.837 | .457 | .261 | .148 |
| PAH (µg/g) | .682 | -.074 | -.692 | .226 |
| DOC (µM) | -.635 | -.696 | .181 | .282 |
| POC (µM) | .491 | .745 | -.449 | -.049 |
| NO3 (µM) | .793 | -.456 | -.319 | .245 |
| NH4 (µM) | -.577 | .784 | .218 | -.074 |
| UREA (µM) | .465 | .303 | -.821 | -.134 |
| Org-C% | .334 | .696 | .489 | .406 |
| Org-N% | .401 | .822 | .362 | .178 |
| %sand | -.965 | -.118 | -.221 | -.082 |
| % Silt | .676 | -.496 | .349 | .419 |
| % Clay | .963 | .014 | .215 | .163 |
| POC_µg/L | .912 | -.120 | -.261 | -.293 |
| PON_µg/L | .546 | -.590 | .094 | -.587 |
| C/N | .489 | -.814 | .311 | -.039 |
| TSPM_mg/L | .171 | .021 | .775 | -.608 |
| Chl a at bottom | .681 | .699 | .101 | -.193 |
| Fe | .983 | -.080 | .139 | .086 |
| Cr | .971 | -.033 | .218 | .095 |
| Sn | .975 | -.062 | .206 | -.061 |
| Be | .981 | -.020 | .163 | .104 |
